# Supplementary material for: Mucosal Vaccination Strategies against Clostridioides difficile Infection
Source: MDPI journal article supplement (doi:10.3390/vaccines11050887), 2023-04-23
Supplement: s1 [file s1]

Supplementary Information

# Mucosal Vaccination Strategies Against *Clostridioides difficile* Infection

Joshua Heuler , Harish Chandra<sup>2</sup> and Xingmin Sun \*

**Supplementary Table S1 . *C. difficile* vaccine candidates in clinical trials.**

| Name (Manufacturer)  | Strategy                                                    | Status    | Findings                                                                                                                                                                                                                                                                                                                                                                                                                                                                                                                  | References      |
|----------------------|-------------------------------------------------------------|-----------|---------------------------------------------------------------------------------------------------------------------------------------------------------------------------------------------------------------------------------------------------------------------------------------------------------------------------------------------------------------------------------------------------------------------------------------------------------------------------------------------------------------------------|-----------------|
| PF-06425090 (Pfizer) | Toxoid; genetically and chemically detoxified TcdA and TcdB | Phase III | <i>In vitro</i>                                                                                                                                                                                                                                                                                                                                                                                                                                                                                                           |                 |
|                      |                                                             |           | <ul style="list-style-type: none"> <li>Produced mutant TcdA and TcdB using an expression vector in a non-sporulating <i>C. difficile</i> strain that does not carry either <i>tcdA</i> or <i>tcdB</i></li> <li>Mutant TcdA (D285A/D287A) and TcdB (D286A/D288A) lacked glucosyltransferase and autoproteolytic processing activities</li> <li>Toxin mutants were found to have greatly reduced toxicity to IMR-90 fibroblasts</li> <li>Formalin inactivation removed residual toxicity of mutant TcdA and TcdB</li> </ul> | NCT01706367 [1] |
|                      |                                                             |           | <i>In vivo</i>                                                                                                                                                                                                                                                                                                                                                                                                                                                                                                            |                 |
|                      |                                                             |           | <ul style="list-style-type: none"> <li>Inactivated, mutant TcdB and TcdA were immunogenic in hamsters</li> <li>Vaccine offered 60% protection from death compared to 0% in unvaccinated hamsters</li> </ul>                                                                                                                                                                                                                                                                                                               | NCT01706367 [1] |
|                      |                                                             |           | Human trials                                                                                                                                                                                                                                                                                                                                                                                                                                                                                                              |                 |
|                      |                                                             |           | <ul style="list-style-type: none"> <li>In 50-85 year olds, vaccine was immunogenic and safe</li> <li>Vaccine was less immunogenic with aluminum hydroxide adjuvant</li> <li>No dose response observed</li> </ul>                                                                                                                                                                                                                                                                                                          | NCT01706367 [2] |
|                      |                                                             |           | <ul style="list-style-type: none"> <li>Vaccine was safe and immunogenic in 65-85 year olds</li> <li>Optimized vaccine dose amount and time interval between the three doses</li> </ul>                                                                                                                                                                                                                                                                                                                                    | NCT02561195 [3] |
| VLA84 (Valneva)      | recombinant chimeric TcdB and TcdA binding domains          | Phase II  | <ul style="list-style-type: none"> <li>Vaccine candidate offered complete protection from severe CDI as well as reduced CDI episode length</li> <li>Only 31-49% efficacy at preventing primary CDI, which did not meet study goals</li> </ul>                                                                                                                                                                                                                                                                             | NCT03090191     |
|                      |                                                             |           | <i>In vitro</i>                                                                                                                                                                                                                                                                                                                                                                                                                                                                                                           |                 |
|                      |                                                             |           | <ul style="list-style-type: none"> <li>Vaccine-induced antibodies neutralized toxin activity in T84 cells</li> </ul>                                                                                                                                                                                                                                                                                                                                                                                                      | [4]             |
|                      |                                                             |           | <ul style="list-style-type: none"> <li>Vaccination of mice, hamsters, and monkeys with fusion protein induced antibodies that could neutralize toxins in a Vero cell model</li> <li>Dose-dependent response observed between antibody neutralization capability and use of vaccine adjuvant, aluminum hydroxide</li> </ul>                                                                                                                                                                                                | [5]             |
|                      |                                                             |           | <i>In vivo</i>                                                                                                                                                                                                                                                                                                                                                                                                                                                                                                            |                 |
|                      |                                                             |           | <ul style="list-style-type: none"> <li>Vaccine provided mice with complete protection from death from TcdA challenge</li> <li>Vaccine protection from death by TcdB challenge in mice was strong</li> <li>In hamsters, vaccine offered complete protection from non-lethal dose of <i>C. difficile</i> even without adjuvant, but adjuvant was required for complete protection from lethal <i>C. difficile</i> dose</li> </ul>                                                                                           | [5]             |
|                      |                                                             |           | Human trials                                                                                                                                                                                                                                                                                                                                                                                                                                                                                                              |                 |
|                      |                                                             |           | <ul style="list-style-type: none"> <li>VLA84 was safe and immunogenic in adults</li> <li>IgG antibodies responses lasted at least 6 months</li> </ul>                                                                                                                                                                                                                                                                                                                                                                     | [4]             |

Continued.

Supplementary Table S1 Cont.

| Name (Manufacturer)        | Strategy                           | Status           | Findings                                                                                                                                                                                |                                   |
|----------------------------|------------------------------------|------------------|-----------------------------------------------------------------------------------------------------------------------------------------------------------------------------------------|-----------------------------------|
| Cdiffense (Sanofi/Pasteur) | Formalin-inactivated TcdA and TcdB | Phase III halted | <i>In vitro</i>                                                                                                                                                                         |                                   |
|                            |                                    |                  | • Anti-TcdA and anti-TcdB antibodies triggered by the vaccine could neutralize the toxic effect on IMR-90 fibroblasts                                                                   | [6]                               |
|                            |                                    |                  | Human trials                                                                                                                                                                            |                                   |
|                            |                                    |                  | • Parenteral administration of TcdA toxoid triggered significant, protective levels of anti-TcdA antibodies in healthy individuals                                                      | [7]                               |
|                            |                                    |                  | • Vaccine was safe and immunogenic in patients with recurrent CDI<br>• Prevented recurrence of CDI, albeit sample size was small (3 patients)                                           | [6]                               |
|                            |                                    |                  | • Candidate was immunogenic and safe in a cohort of healthy individuals<br>• Adjuvant use increased immunogenicity, but the effect was not significant                                  | [8]                               |
|                            |                                    |                  | • Vaccine was immunogenic and safe in patients 18-55 years                                                                                                                              | NCT00772954                       |
|                            |                                    |                  | • Vaccine was immunogenic and safe in patients 18-55 years old (NCT001278030 and >65 years old (NCT00214461)                                                                            | NCT00127803<br>NCT00214461<br>[9] |
|                            |                                    |                  | • Optimized vaccine dose amount and time interval between the three doses<br>• Determined that vaccine was more immunogenic in people aged 40–75 years with aluminum hydroxide adjuvant | NCT01230957<br>[10]               |
|                            |                                    |                  | • Phase III testing found that the vaccine candidate did not provide protection from CDI                                                                                                | NCT00772343<br>[11]               |

## References

- Donald, R.G.; Flint, M.; Kalyan, N.; Johnson, E.; Witko, S.E.; Kotash, C.; Zhao, P.; Megati, S.; Yurgelonis, I.; Lee, P.K. A novel approach to generate a recombinant toxoid vaccine against *Clostridium difficile*. *Microbiology* **2013**, *159*, 1254.
- Sheldon, E.; Kitchin, N.; Peng, Y.; Eiden, J.; Gruber, W.; Johnson, E.; Jansen, K.U.; Pride, M.W.; Pedneault, L. A phase 1, placebo-controlled, randomized study of the safety, tolerability, and immunogenicity of a *Clostridium difficile* vaccine administered with or without aluminum hydroxide in healthy adults. *Vaccine* **2016**, *34*, 2082-2091.
- Kitchin, N.; Remich, S.A.; Peterson, J.; Peng, Y.; Gruber, W.C.; Jansen, K.U.; Pride, M.W.; Anderson, A.S.; Knirsch, C.; Webber, C. A phase 2 study evaluating the safety, tolerability, and immunogenicity of two 3-dose regimens of a *Clostridium difficile* vaccine in healthy US adults aged 65 to 85 years. *Clinical Infectious Diseases* **2020**, *70*, 1-10.
- Bézay, N.; Ayad, A.; Dubischar, K.; Firbas, C.; Hochreiter, R.; Kiermayr, S.; Kiss, I.; Pinl, F.; Jilma, B.; Westritschnig, K. Safety, immunogenicity and dose response of VLA84, a new vaccine candidate against *Clostridium difficile*, in healthy volunteers. *Vaccine* **2016**, *34*, 2585-2592.
- Tian, J.-H.; Fuhrmann, S.R.; Kluepfel-Stahl, S.; Carman, R.J.; Ellingsworth, L.; Flyer, D.C. A novel fusion protein containing the receptor binding domains of *C. difficile* toxin A and toxin B elicits protective immunity against lethal toxin and spore challenge in preclinical efficacy models. *Vaccine* **2012**, *30*, 4249-4258.

- 
6. Sougioultzis, S.; Kyne, L.; Drudy, D.; Keates, S.; Maroo, S.; Pothoulakis, C.; Giannasca, P.J.; Lee, C.K.; Warny, M.; Monath, T.P. Clostridium difficile toxoid vaccine in recurrent C. difficile-associated diarrhea. *Gastroenterology* **2005**, *128*, 764-770.
  7. Aboudola, S.; Kotloff, K.L.; Kyne, L.; Warny, M.; Kelly, E.C.; Sougioultzis, S.; Giannasca, P.J.; Monath, T.P.; Kelly, C.P. Clostridium difficile vaccine and serum immunoglobulin G antibody response to toxin A. *Infection and immunity* **2003**, *71*, 1608-1610.
  8. Kotloff, K.L.; Wasserman, S.S.; Losonsky, G.A.; Thomas Jr, W.; Nichols, R.; Edelman, R.; Bridwell, M.; Monath, T.P. Safety and immunogenicity of increasing doses of a Clostridium difficile toxoid vaccine administered to healthy adults. *Infection and immunity* **2001**, *69*, 988-995.
  9. Greenberg, R.N.; Marbury, T.C.; Foglia, G.; Warny, M. Phase I dose finding studies of an adjuvanted Clostridium difficile toxoid vaccine. *Vaccine* **2012**, *30*, 2245-2249.
  10. de Bruyn, G.; Saleh, J.; Workman, D.; Pollak, R.; Elinoff, V.; Fraser, N.J.; Lefebvre, G.; Martens, M.; Mills, R.E.; Nathan, R. Defining the optimal formulation and schedule of a candidate toxoid vaccine against Clostridium difficile infection: A randomized Phase 2 clinical trial. *Vaccine* **2016**, *34*, 2170-2178.
  11. de Bruyn, G.; Gordon, D.L.; Steiner, T.; Tambyah, P.; Cosgrove, C.; Martens, M.; Bassily, E.; Chan, E.-S.; Patel, D.; Chen, J. Safety, immunogenicity, and efficacy of a Clostridioides difficile toxoid vaccine candidate: a phase 3 multicentre, observer-blind, randomised, controlled trial. *The Lancet Infectious Diseases* **2021**, *21*, 252-262.
